# Supplementary material
Source: publisher site journal article supplement (https://static.cambridge.org/content/id/urn:cambridge.org:id:article:S0022149X14000194/resource/name/H2434SupplementaryTableS1.doc)
Supplement: Supplementary file 1 [file H2434SupplementaryTableS1.doc]

Supplementary Table S1 – The occurrence with accession numbers where known (n= not available) of isolates of entomopathogenic nematodes from sampling sites in Italy from 1990-2010; acronyms of localities in parentheses, APU – Apulia, BAS – Basilicata, CAL – Calabria, CAM – Campania, SAR – Sardinia, SIC – Sicily, SIC-ai – Aeolian islands, SIC-pi – Pantelleria island, TUS – Tuscany.

| **Strain** | **Locality** | **Italian regions** | **Alt.** | **Date** | **Vegetation** | **Habitat** | **Soil text** | **Species** | **Accession number** |
| --- | --- | --- | --- | --- | --- | --- | --- | --- | --- |
| IS-SA1 | Sammichele (BA) | APU | 280 | Jun 1990 | Cherry | Orchard | Sandy loam | *S. feltiae* | n.a. |
| IS-CO1 | Corato (BA) | APU | 230 | Feb 1992 | Wild vegetation | Uncultivated land | Silt | *S. feltiae* | HQ412814.1 |
| IS-GR1 | Grassano (MT) | BAS | 300 | Nov 1995 | Tomato | Field | Clay loam | *S. feltiae* | HQ412818.1 |
| IS-G4 | Gravina (BA) | APU | 380 | Oct 1995 | Pine | Pinewood | Silty loam | *S. feltiae* | n.a. |
| IS-G8 | Gravina (BA) | APU | 380 | Dec 1995 | Pine | Pinewood | Sandy loam | *S. feltiae* | n.a. |
| IS-CE2 | Cerignola (FG) | APU | 120 | Oct 1996 | Olive | Orchard | Sandy loam | *S. feltiae* | HQ412813.1 |
| IS-MO1 | Melfi (PZ) | BAS | 500 | Sep 1996 | Apple | Orchard | Sandy loam | *S. feltiae* | HQ416966.1 |
| IS-CL2 | Celzi (AV) | CAM | 650 | Oct 1996 | Pear | Orchard | Sandy loam | *S. feltiae* | HQ412830.1 |
| IS-MU1 | Mugnano del Cardinale (AV) | CAM | 550 | Oct 1996 | Kaki | Orchard | Clay loam | *S. feltiae* | HQ412841.1 |
| IS-MV1 | Montevergine (AV) | CAM | 700 | Oct 1996 | Chestnut | Broadleaf wood | Sandy loam | *S. feltiae* | n.a. |
| IS-LE1 | Tricase (LE) | APU | 50 | Oct 1997 | Meadows | Grassland | Silty loam | *S. feltiae* | HQ412819.1 |
| IS-TE1 | Terlizzi (BA) | APU | 200 | Feb 1998 | Cherry | Orchard | Clay loam | *S. feltiae* | HQ412831.1 |
| IS-MF1 | Martina Franca (TA) | APU | 350 | Mar 1998 | Oak | Broadleaf wood | Silty loam | *S. feltiae* | HQ412826.1 |
| IS-CS6 | Brindisi (BR) | APU | 20 | Apr 1998 | Artichoke | Field | Sand | *S. feltiae* | HQ412815.1 |
| IS-CZ19 | Giamberga (CS) | CAL | 800 | May 1998 | Pine | Pinewood | Sandy loam | *S. feltiae* | HQ412816.1 |
| IS-CZ23 | Cecita lake (CS) | CAL | 1100 | May 1998 | Pine | Pinewood | Sandy loam | *S. feltiae* | HQ412817.1 |
| IS-MA12 | Chiese Rupestri Park (MT) | BAS | 400 | Sep 1998 | Cave | Cave | Sandy loam | *S. feltiae* | HQ412827.1 |
| IS-G16 | Gravina (BA) | APU | 380 | Mar 1999 | Pine | Pinewood | Silty loam | *S. feltiae* | HQ412828.1 |
| IS-Q1 | Quasano (BA) | APU | 150 | May 1999 | Meadows | Grassland | Silty loam | *S. feltiae* | HQ412829.1 |
| IS-MSA3 | Monte S. Angelo (FG) | APU | 790 | Mar 1999 | Meadows | Grassland | Silt | *S. feltiae* | HQ412811.1 |
| IS-MSA4 | Monte S. Angelo (FG) | APU | 790 | Nov 1999 | Meadows | Grassland | Silt | *S. feltiae* | HQ412825.1 |
| IS-BQ1 | Monte S. Angelo (FG) | APU | 787 | Dec 1999 | Meadows | Grassland | Silty loam | *S. feltiae* | n.a. |
| IS-B6 | Bitonto (BA) | APU | 118 | Dec 1999 | Olive | Orchard | Silt | *S. feltiae* | n.a. |
| IS-TG4 | Brindisi (BR) | APU | 20 | Jan 2000 | Swamp | Wetland | Sandy loam | *S. feltiae* | HQ412824.1 |
| IS-OT2 | Alimini Lake (LE) | APU | 25 | Apr 2000 | Pine | Pinewood | Sand | *S. feltiae* | HQ412820.1 |
| IS-ESA | S.Alfio (CT) | SIC | 530 | Sep 2005 | Chestnut | Broadleaf wood | Sandy loam | *S. feltiae* | GU599911.1 |
| IS-RC8 | Aspromonte (RC) | CAL | 680 | Jul 2005 | Oak | Broadleaf wood | Sandy loam | *S. feltiae* | n.a. |
| IS-ESC2 | Salto del cane (CT) | SIC | 1200 | Sep 2005 | Chestnut | Broadleaf wood | Sandy loam | *S. feltiae* | GU599905.1; GU599907.1 |
| IS-EPP | Piano Porcheria (CT) | SIC | 1000 | Sep 2005 | Chestnut | Broadleaf wood | Sandy loam | *S. feltiae* | GU599908.1 |
| IS-EMM1 | Mt. Monaco (CT) | SIC | 820 | Oct 2005 | Chestnut | Broadleaf wood | Sandy loam | *S. feltiae* | GU599904.1; GU599910.1 |
| IS-EPC | Pietracannone (CT) | SIC | 1000 | Oct 2005 | Chestnut | Broadleaf wood | Sandy loam | *S. feltiae* | GU599912.1 |
| IS-ETA | Tarderia (CT) | SIC | 750 | Oct 2005 | Chestnut | Broadleaf wood | Sandy loam | *S. feltiae* | GU599906.1; GU599909.1 |
| IS-EMA | Triciala (CT) | SIC | 950 | Oct 2005 | Chestnut | Broadleaf wood | Sandy loam | *S. feltiae* | GU599913.1 |
| IS-OT9 | Otranto (LE) | APU | 20 | May 2006 | Oak | Broadleaf wood | Sandy loam | *S. feltiae* | HQ416967.1 |
| IS-OT10 | Otranto (LE) | APU | 20 | May 2006 | Pine | Pinewood | Sand | *S. feltiae* | n.a. |
| IS-OT11 | Otranto (LE) | APU | 20 | May 2006 | Pasture | Grassland | Sand | *S. feltiae* | HQ412821.1 |
| IS-OT14 | Otranto (LE) | APU | 20 | Jun 2006 | Pine | Pinewood | Sand | *S. feltiae* | HQ412822.1 |
| IS-OT15 | Otranto (LE) | APU | 20 | Jun 2006 | Artichoke | Field | Sand | *S. feltiae* | HQ412823.1 |
| IS-M31 | Canale di Pirro (BR) | APU | 300 | May 2007 | Wheat | Field | Silty loam | *S. feltiae* | n.a. |
| IS-M23 | Pianelle Park (TA) | APU | 200 | May 2007 | Oak | Broadleaf wood | Sandy loam | *S. feltiae* | n.a. |
| IS-M50 | Canale di Pirro (TA) | APU | 300 | May 2007 | Artichoke | Filed | Sandy loam | *S. feltiae* | n.a. |
| IS-M62 | Galeone Forest (TA) | APU | 300 | Jun 2007 | Oak | Broadleaf wood | Sandy loam | *S. feltiae* | n.a. |
| IS-FF1 | Francavilla Fontana (BR) | APU | 150 | Sep 2008 | Wheat | Field | Clay loam | *S. feltiae* | n.a. |
| IS-CHIA2 | Chianni (PI) | TUS | 280 | Nov 2008 | Oak | Broadleaf wood | Sandy loam | *S. feltiae* | HQ412838.1 |
| IS-CAST5 | Castelpoggio (MS) | TUS | 550 | Nov 2008 | Oak | Broadleaf wood | Sandy loam | *S. feltiae* | HQ412837.1 |
| IS-CTSA18 | San Leonardo River (SR) | SIC | 5 | Dec 2008 | Eucalyptus | Pinewood | Sand | *S. feltiae* | HQ412832.1 |
| IS-CT27 | Mt. Serra (CT) | SIC | 450 | Apr 2009 | Oak | Broadleaf wood | Sandy loam | *S. feltiae* | HQ412834.1 |
| IS-VE1 | Oasi di Vendicari (SR) | SIC | 23 | May 2009 | Olive | Orchard | Clay loam | *S. feltiae* | HQ412835.1 |
| IS-SAL3 | Salina (ME) | SIC-ai | 130 | Sep 2009 | Pine | Pinewood | Sandy loam | *S. feltiae* | HQ412836.1 |
| IS-MUE3 | Pantelleria (TP) | SIC-pi | 50 | Jun 2010 | Mulberry | Broadleaf wood | Sandy loam | *S. feltiae* | n.a. |
| IS-PR4 | Gornalunga Lake (CT) | SIC | 800 | Nov 2010 | Pine | Pinewood | Sandy loam | *S. feltiae* | n.a. |
| IH-ME2 | Mellitto (BA) | APU | 350 | Sep 1996 | Wild vegetation | Uncultivated land | Silty loam | *H. bacteriophora* | n.a. |
| IH-C11 | Castellaneta (TA) | APU | 0 | Sep 1996 | Sandy beach | Sea coast | Sand | *H. bacteriophora* | n.a. |
| IH-C6 | Castellaneta (TA) | APU | 50 | Sep 1996 | Pine | Pinewood | Sand | *H. bacteriophora* | n.a. |
| IH-C3 | Castellaneta (TA) | APU | 50 | Sep 1996 | Maize | Field | Clay loam | *H. bacteriophora* | n.a. |
| IH-C13 | Castellaneta (TA) | APU | 50 | Sep 1996 | Olive | Orchard | Silt | *H. bacteriophora* | n.a. |
| IH-LA3 | Lavello (PZ) | BAS | 650 | Sep 1996 | Turnip | Field | Silt | *H. bacteriophora* | n.a. |
| IH-LU1 | Lucera (FG) | APU | 70 | Oct 1996 | Wild vegetation | Uncultivated land | Clay loam | *H. bacteriophora* | n.a. |
| IH-MS6 | Margherita di Savoia (PR) | APU | 40 | Oct 1996 | Vineyard | Orchard | Clay loam | *H. bacteriophora* | n.a. |
| IH-CE1 | Cerignola (FG) | APU | 120 | Oct 1996 | Artichoke | Field | Sandy loam | *H. bacteriophora* | n.a. |
| IH-SS1 | San Severo (FG) | APU | 89 | Mar 1997 | Vineyard | Orchard | Sandy loam | *H. bacteriophora* | n.a. |
| IH-LE4 | S. Giorgio (LE) | APU | 0 | Oct 1997 | Sandy beach | Sea coast | Sand | *H. bacteriophora* | n.a. |
| IH-MR4 | Manfredonia (FG) | APU | 50 | Nov 1997 | Wild vegetation | Uncultivated land | Sandy loam | *H. bacteriophora* | n.a. |
| IH-MR8 | Manfredonia (FG) | APU | 50 | Nov 1997 | Vineyard | Orchard | Silty loam | *H. bacteriophora* | n.a. |
| IH-MR9 | Manfredonia (FG) | APU | 50 | Nov 1997 | Olive | Orchard | Silty loam | *H. bacteriophora* | n.a. |
| IH-CS9 | Brindisi (BR) | APU | 20 | Apr 1998 | Wild vegetation | Uncultivated land | Silty loam | *H. bacteriophora* | n.a. |
| IH-CS15 | Cellino S. Marco (LE) | APU | 70 | Apr 1998 | Wild vegetation | Uncultivated land | Silty loam | *H. bacteriophora* | n.a. |
| IH-C38 | Castellaneta (TA) | APU | 0 | Apr 2001 | Boot topping | Sea coast | Sand | *H. bacteriophora* | n.a. |
| IH-CS17 | S.Pietro Vernotico (BR) | APU | 20 | Nov 2001 | Vineyard | Orchard | Silty loam | *H. bacteriophora* | n.a. |
| IH-CS19 | S.Pietro Vernotico (BR) | APU | 20 | Nov 2001 | Wild vegetation | Uncultivated land | Silty loam | *H. bacteriophora* | n.a. |
| IH-C39 | Castellaneta (TA) | APU | 30 | Jan 2003 | Pine | Pinewood | Sandy loam | *H. bacteriophora* | n.a. |
| IH-OF5 | Locone (BT) | APU | 180 | Nov 2003 | Vineyard | Orchard | Sand | *H. bacteriophora* | n.a. |
| IH-OF35 | Casalonga (BT) | APU | 60 | Jan 2004 | Wild vegetation | Uncultivated land | Silty loam | *H. bacteriophora* | n.a. |
| IH-OF36 | Masseria Ruotella (BT) | APU | 70 | Jan 2004 | Peach | Orchard | Silty loam | *H. bacteriophora* | n.a. |
| IH-OF39 | Masseria Ruotella (BT) | APU | 70 | Jan 2004 | Vineyard | Orchard | Sandy loam | *H. bacteriophora* | n.a. |
| IH-OF41 | Casalonga (BT) | APU | 60 | Jan 2004 | Wild vegetation | Uncultivated land | Sandy loam | *H. bacteriophora* | n.a. |
| IH-OF45 | Ofanto (BT) | APU | 30 | Jan 2004 | Wild vegetation | Uncultivated land | Sandy loam | *H. bacteriophora* | n.a. |
| IH-M33 | Canale di Pirro (BR) | APU | 300 | May 2007 | Pine | Pinewood | Silty loam | *H. bacteriophora* | n.a. |
| IH-CTSA10 | Oasi del Simeto (CT) | SIC | 0 | Dec 2008 | Pine | Pinewood | Sand | *H. bacteriophora* | n.a. |
| IH-C | Mt. Scala (CT) | SIC | 650 | Feb 2009 | River border | River border | Sand | *H. bacteriophora* | n.a. |
| IH-D | Mt. Scala (CT) | SIC | 650 | Feb 2009 | Olive | Orchard | Clay loam | *H. bacteriophora* | n.a. |
| IH-M37 | Canale di Pirro (BR) | APU | 300 | May 2009 | Pine | Pinewood | Silty loam | *H. bacteriophora* | n.a. |
| IH-AR3 | Firenze (FI) | TUS | 350 | Jun 2009 | Olive | Orchard | Clay loam | *H. bacteriophora* | n.a. |
| IS-SA21 | Salina (ME) | SIC-ai | 75 | Sep 2009 | Pine | Pinewood | Sandy loam | *H. bacteriophora* | n.a. |
| IH-M38 | Canale di Pirro (BR) | APU | 300 | May 2010 | Pine | Pinewood | Sandy loam | *H. bacteriophora* | n.a. |
| IH-M47 | Canale di Pirro (BR) | APU | 300 | May 2010 | Pine | Pinewood | Sandy loam | *H. bacteriophora* | n.a. |
| IH-M48 | Canale di Pirro (BR) | APU | 300 | May 2010 | Pine | Pinewood | Sandy loam | *H. bacteriophora* | n.a. |
| IH-CAM2 | Pantelleria (TP) | SIC-pi | 50 | Jun 2010 | Wild vegetation | Uncultivated land | Sandy loam | *H. bacteriophora* | n.a. |
| IH-LG10 | Pantelleria (TP) | SIC-pi | 50 | Jun 2010 | Wild vegetation | Uncultivated land | Sandy loam | *H. bacteriophora* | n.a. |
| IH-LG14 | Pantelleria (TP) | SIC-pi | 50 | Jun 2010 | Pine | Pinewood | Sandy loam | *H. bacteriophora* | n.a. |
| IH-BAL1 | Pantelleria (TP) | SIC-pi | 50 | Jun 2010 | Pine | Pinewood | Sandy loam | *H. bacteriophora* | n.a. |
| IH-BTU1 | Pantelleria (TP) | SIC-pi | 0 | Jun 2010 | Meadows | Grassland | Sandy loam | *H. bacteriophora* | n.a. |
| IH-CAMP4 | Gornalunga Lake (CT) | SIC | 800 | Nov 2010 | Pine | Pinewood | Sand | *H. bacteriophora* | n.a. |
| IH-CTSA20 | San Leonardo River (SR) | SIC | 50 | Nov 2010 | Wild vegetation | Uncultivated land | Sand | *H. bacteriophora* | n.a. |
| IS-TR1 | Trivigno (PZ) | BAS | 350 | Oct 1995 | Oak | Broadleaf wood | Clay loam | *S. affine* | n.a. |
| IS-FO2 | Forino (AV) | CAM | 650 | Oct 1996 | Oak | Broadleaf wood | Sandy loam | *S. affine* | n.a. |
| IS-FO1 | Forino (AV) | CAM | 650 | Oct 1996 | Oak | Broadleaf wood | Sandy loam | *S. affine* | n.a. |
| IS-AR1 | Ariano Irpino (AV) | CAM | 650 | Oct 1996 | Vineyard | Orchard | Clay loam | *S. affine* | n.a. |
| IS-ST12 | Santeramo (BA) | APU | 400 | Apr 1998 | Oak | Broadleaf wood | Silty loam | *S. affine* | n.a. |
| IS-CZ7 | Cersosimo (PZ) | BAS | 250 | May 1998 | Oak | Broadleaf wood | Sandy loam | *S. affine* | n.a. |
| IS-CZ10 | S. Paolo Albanese (PZ) | BAS | 800 | May 1998 | Oak | Broadleaf wood | Clay loam | *S. affine* | n.a. |
| IS-QU3 | Quasano (BA) | APU | 150 | Dec 1999 | Oak | Broadleaf wood | Silty loam | *S. affine* | n.a. |
| IS-LP2 | Lagopesole (PZ) | BAS | 700 | Jan 2000 | Oak | Broadleaf wood | Silt | *S. affine* | n.a. |
| IS-LP3 | Lagopesole (PZ) | BAS | 700 | Jan 2000 | Oak | Broadleaf wood | Silt | *S. affine* | n.a. |
| IS-FI1 | Tre croci (FI) | TUS | 650 | Nov 2005 | Oak | Broadleaf wood | Silty loam | *S. affine* | n.a. |
| IS-CAST1 | Castelpoggio (MS) | TUS | 550 | Nov 2008 | Oak | Broadleaf wood | Silty loam | *S. affine* | HQ412839.1 |
| IS-C15 | Castellaneta (TA) | APU | 0 | Sep 1996 | Sandy beach | Sea coast | Sand | *S. apuliae* | n.a. |
| IS-MS10 | Margherita di Savoia (FG) | APU | 0 | Oct 1996 | Salt pan border | Salt pan | Silt | *S. apuliae* | n.a. |
| IS-LD3 | Metaponto (MT) | BAS | 50 | Oct 1996 | Pine | Pinewood | Sand | *S. apuliae* | n.a. |
| IS-MS3 | Margherita di Savoia (FG) | APU | 20 | Oct 1996 | Wild vegetation | Uncultivated land | Sand | *S. apuliae* | n.a. |
| IS-LE13 | Torre Pali (LE) | APU | 0 | Oct 1997 | Sandy beach | Sea coast | Sand | *S. apuliae* | n.a. |
| IS-ZA11 | Zapponeta (FG) | APU | 50 | Nov 1997 | Wild vegetation | Uncultivated land | Silty loam | *S. apuliae* | n.a. |
| IS-CS3 | Brindisi (BR) | APU | 50 | Mar 1998 | Tamarisk | Uncultivated land | Sand | *S. apuliae* | GU599901.1; HQ416968.1 |
| IS-TA14 | Taranto (TA) | APU | 0 | May 1998 | Sandy beach | Sea coast | Sand | *S. apuliae* | n.a. |
| IS-SA2 | Platamona (SS) | SAR | 10 | Jun 2000 | Sandy beach | Sea coast | Sand | *S. ichnusae* | n.a. |
| IS-SA4 | Platamona (SS) | SAR | 0 | Jun 2000 | Sandy beach | Sea coast | Sand | *S. ichnusae* | n.a. |
| IS-SA6 | Platamona (SS) | SAR | 10 | Jun 2000 | Sandy beach | Sea coast | Sand | *S. ichnusae* | n.a. |
| IS-SA16 | Tempio Pausania (OT) | SAR | 250 | Apr 2009 | Oak | Broadleaf wood | Sandy loam | *S. ichnusae* | n.a. |
| IS-SA32 | Tempio Pausania (OT) | SAR | 250 | Apr 2009 | Oak | Broadleaf wood | Sandy loam | *S. ichnusae* | n.a. |
| IS-EMM2 | Mt. Monaco (CT) | SIC | 800 | Oct 2005 | Chestnut | Broadleaf wood | Sandy loam | *S. kraussei* | GU599915.1 |
| IS-EPL | Piano Lepre (CT) | SIC | 700 | Oct 2005 | Chestnut | Broadleaf wood | Sandy loam | *S. kraussei* | GU599917.1 |
| IS-EBL | Piano Balilla (CT) | SIC | 1400 | Oct 2005 | Chestnut | Broadleaf wood | Sandy loam | *S. kraussei* | GU599918.1 |
| IS-ESC3 | Salto del cane (CT) | SIC | 1200 | Sep 2005 | Chestnut | Broadleaf wood | Sandy loam | *S. kraussei* | GU599903.1; GU599916.1 |
| IS-MR7 | Manfredonia (FG) | APU | 50 | Nov 1997 | Artichoke | Field | Silt | *S. carpocapsae* | n.a. |
| IS-SASS3 | Sassofortino (GR) | TUS | 600 | Nov 2008 | Olive | Orchard | Silty loam | *S. carpocapsae* | to be deposited |
| IS-MPI4 | Greve in Chianti (FI) | TUS | 550 | Nov 2008 | Maize | Field | Sandy loam | *S. carpocapsae* | n.a. |
| IS-CHIA1 | Chianni (PI) | TUS | 280 | Nov 2007 | Oak | Broadleaf wood | Sandy loam | *Steiner. sp. MY7* | to be deposited |
| IS-CHIA4 | Chianni (PI) | TUS | 280 | Nov 2007 | Oak | Broadleaf wood | Sandy loam | *Steiner. sp. MY7* | to be deposited |
| IS-CHIA5 | Chianni (PI) | TUS | 280 | Nov 2008 | Oak | Broadleaf wood | Sandy loam | *Steiner. sp. MY7* | to be deposited |
| IS-C31 | Castellaneta (TA) | APU | 50 | May 2000 | Pine | Pinewood | Sand | *S. arenarium* | n.a.. |
| IH-CTSA17 | San Leonardo River (SR) | SIC | 70 | Dec 2008 | Eucalyptus | Pinewood | Sand | *H. downesi* | to be deposited |
| IS-ESC1 | Salto del cane (CT) | SIC | 1300 | Sep 2005 | Chestnut | Broadleaf wood | Sandy loam | *S. vulcanicum* | GU929442.1;  GU929443.1 |
| IH-PR4 | Gornalunga Lake (CT) | SIC | 20 | Nov 2010 | Pine | Pinewood | Sandy loam | *H. megidis* | n.a. |
